# Supplementary material for: Development and Validation of a Bioanalytical Method for the Quantification of Nitrated Fatty Acids in Plasma Using LC-MS/MS: Application to Cardiovascular Patients
Source: MDPI journal article supplement (doi:10.3390/separations10020087), 2023-01-27
Supplement: s1 [file s1]

**Supplementary Table S1: quantification of endogenous NO<sub>2</sub>-OA and NO<sub>2</sub>-LA in IHD patients' plasma by standard addition method**

| Sample      | NO <sub>2</sub> -OA    |             |                       | NO <sub>2</sub> -LA    |             |                       |
|-------------|------------------------|-------------|-----------------------|------------------------|-------------|-----------------------|
|             | Regression equation    | x-intercept | Endogenous conc. (nM) | Regression equation    | x-intercept | Endogenous conc. (nM) |
| <b>P1</b>   | $y = 0.0051x + 0.3301$ | -64.73      | 12.95                 | $y = 0.0042x + 0.0462$ | -11.00      | 2.20                  |
| <b>P2</b>   | $y = 0.0044x + 0.3145$ | -71.48      | 14.30                 | $y = 0.0035x + 0.0764$ | -21.83      | 4.37                  |
| <b>P3</b>   | $y = 0.0032x + 0.5034$ | -157.31     | 31.46                 | $y = 0.0048x + 0.0433$ | -9.02       | 1.80                  |
| <b>P4</b>   | $y = 0.0061x + 0.3301$ | -54.11      | 10.82                 | $y = 0.0048x + 0.0998$ | -20.79      | 4.16                  |
| <b>P5</b>   | $y = 0.0052x + 0.4904$ | -94.31      | 18.86                 | $y = 0.0051x + 0.0795$ | -15.59      | 3.12                  |
| <b>P6</b>   | $y = 0.0033x + 0.4037$ | -122.33     | 24.47                 | $y = 0.0021x + 0.0414$ | -19.71      | 3.94                  |
| <b>P7*</b>  | $y = 0.0041x + 0.619$  | -150.98     | 30.20                 | $y = 0.0025x + 0.0693$ | -27.22      | 5.54                  |
| <b>P8</b>   | $y = 0.003x + 0.2042$  | -68.07      | 13.61                 | $y = 0.0048x + 0.0171$ | -3.56       | 0.71                  |
| <b>P9</b>   | $y = 0.0057x + 0.601$  | -105.44     | 21.09                 | $y = 0.0021x + 0.0282$ | -13.43      | 2.69                  |
| <b>P10</b>  | $y = 0.0044x + 0.2935$ | -66.70      | 13.34                 | $y = 0.0035x + 0.0213$ | -6.09       | 1.22                  |
| <b>P11*</b> | $y = 0.0037x + 0.608$  | -164.32     | 32.86                 | $y = 0.0007x + 0.0735$ | -105.00     | 21                    |

**Supplementary Table S1: quantification of endogenous NO<sub>2</sub>-OA and NO<sub>2</sub>-LA in IHD patients' plasma by standard addition method**

| Sample      | NO <sub>2</sub> -OA    |             |                       | NO <sub>2</sub> -LA    |             |                       |
|-------------|------------------------|-------------|-----------------------|------------------------|-------------|-----------------------|
|             | Regression equation    | x-intercept | Endogenous conc. (nM) | Regression equation    | x-intercept | Endogenous conc. (nM) |
| <b>P12</b>  | $y = 0.0048x + 0.4207$ | -87.65      | 17.53                 | $y = 0.002x + 0.0458$  | -22.90      | 4.58                  |
| <b>P13</b>  | $y = 0.0066x + 0.5088$ | -77.09      | 15.42                 | $y = 0.004x + 0.0521$  | -13.03      | 2.61                  |
| <b>P14</b>  | $y = 0.0057x + 0.8791$ | -175.82     | 35.16                 | $y = 0.0043x + 0.0375$ | -8.72       | 1.74                  |
| <b>P15</b>  | $y = 0.0026x + 0.4112$ | -158.15     | 31.63                 | $y = 0.0038x + 0.0554$ | -14.58      | 2.92                  |
| <b>P16</b>  | $y = 0.0032x + 0.4564$ | -142.63     | 28.53                 | $y = 0.0035x + 0.0694$ | -19.83      | 3.97                  |
| <b>P17</b>  | $y = 0.007x + 0.3303$  | -47.19      | 9.44                  | $y = 0.0054x + 0.0656$ | -12.15      | 2.43                  |
| <b>P18</b>  | $y = 0.0031x + 0.5078$ | -163.81     | 32.76                 | $y = 0.0023x + 0.0512$ | -22.26      | 4.45                  |
| <b>P19</b>  | $y = 0.0029x + 0.333$  | -144.83     | 22.97                 | $y = 0.0018x + 0.0258$ | -14.33      | 2.87                  |
| <b>P20</b>  | $y = 0.0059x + 0.4888$ | -82.85      | 16.57                 | $y = 0.003x + 0.0495$  | -16.50      | 3.30                  |
| <b>P21</b>  | $y = 0.0036x + 0.3903$ | -108.42     | 21.68                 | $y = 0.0025x + 0.033$  | -13.20      | 2.64                  |
| <b>P22*</b> | $y = 0.0045x + 0.5269$ | -117.09     | 23.42                 | $y = 0.0024x + 0.085$  | -35.42      | 7.08                  |

**Supplementary Table S1: quantification of endogenous NO<sub>2</sub>-OA and NO<sub>2</sub>-LA in IHD patients' plasma by standard addition method**

| Sample     | NO <sub>2</sub> -OA    |             |                       | NO <sub>2</sub> -LA    |             |                       |
|------------|------------------------|-------------|-----------------------|------------------------|-------------|-----------------------|
|            | Regression equation    | x-intercept | Endogenous conc. (nM) | Regression equation    | x-intercept | Endogenous conc. (nM) |
| <b>P23</b> | $y = 0.0082x + 0.6788$ | -82.78      | 16.56                 | $y = 0.0023x + 0.0389$ | -16.91      | 3.38                  |
| <b>P24</b> | $y = 0.0049x + 0.1774$ | -36.20      | 7.24                  | $y = 0.0032x + 0.0193$ | -6.03       | 1.21                  |
| <b>P25</b> | $y = 0.0054x + 0.6526$ | -120.85     | 24.17                 | $y = 0.0029x + 0.0236$ | -19.53      | 3.91                  |
| <b>P26</b> | $y = 0.0018x + 0.3607$ | -200.39     | 40.08                 | $y = 0.0033x + 0.0408$ | -12.36      | 2.47                  |
| <b>P27</b> | $y = 0.0039x + 0.3262$ | -83.64      | 16.73                 | $y = 0.0021x + 0.0356$ | -16.95      | 3.39                  |
| <b>P28</b> | $y = 0.0021x + 0.468$  | -222.86     | 44.57                 | $y = 0.0024x + 0.041$  | -17.21      | 3.44                  |

\* Outliers in NO<sub>2</sub>-LA levels that were removed in statistical analysis

**Supplementary Table S2: Quantification of endogenous NO<sub>2</sub>-OA and NO<sub>2</sub>-LA in healthy controls' plasma by standard addition method**

| Sample     | NO <sub>2</sub> -OA  |             |                       | NO <sub>2</sub> -LA  |             |                       |
|------------|----------------------|-------------|-----------------------|----------------------|-------------|-----------------------|
|            | Regression equation  | x-intercept | Endogenous conc. (nM) | Regression equation  | x-intercept | Endogenous conc. (nM) |
| <b>C1</b>  | 0.0053x + 0.345      | -65.09      | 13.02                 | 0.007x + 0.0596      | -8.51       | 1.7                   |
| <b>C2</b>  | y = 0.0037x + 0.1642 | -44.38      | 8.88                  | y = 0.0023x + 0.0481 | -20.91      | 4.18                  |
| <b>C3</b>  | y = 0.0049x + 0.1368 | -27.92      | 5.58                  | y = 0.0049x + 0.1053 | -21.49      | 4.30                  |
| <b>C4</b>  | y = 0.0027x + 0.2901 | -107.44     | 21.49                 | y = 0.0053x + 0.0737 | -13.91      | 2.78                  |
| <b>C5</b>  | y = 0.0053x + 0.2536 | -47.85      | 9.57                  | y = 0.0032x + 0.0698 | -21.81      | 4.36                  |
| <b>C6</b>  | y = 0.004x + 0.38    | -95.00      | 19.00                 | y = 0.0055x + 0.1107 | -20.13      | 4.03                  |
| <b>C7</b>  | y = 0.0065x + 0.1562 | -24.03      | 4.81                  | y = 0.0072x + 0.0476 | -6.61       | 1.32                  |
| <b>C8</b>  | y = 0.005x + 0.2138  | -42.76      | 8.55                  | y = 0.0078x + 0.0526 | -6.74       | 1.35                  |
| <b>C9</b>  | y = 0.0049x + 0.2382 | -48.61      | 9.72                  | y = 0.0047x + 0.0295 | -6.28       | 1.26                  |
| <b>C10</b> | y = 0.004x + 0.2704  | -67.60      | 13.52                 | y = 0.0059x + 0.1128 | -19.12      | 3.82                  |
| <b>C11</b> | y = 0.0042x + 0.4418 | -105.19     | 21.04                 | y = 0.0014x + 0.0463 | -33.07      | 6.61                  |

**Supplementary Table S2: Quantification of endogenous NO<sub>2</sub>-OA and NO<sub>2</sub>-LA in healthy controls' plasma by standard addition method**

| Sample     | NO <sub>2</sub> -OA        |             |                       | NO <sub>2</sub> -LA        |             |                       |
|------------|----------------------------|-------------|-----------------------|----------------------------|-------------|-----------------------|
|            | Regression equation        | x-intercept | Endogenous conc. (nM) | Regression equation        | x-intercept | Endogenous conc. (nM) |
| <b>C12</b> | y =<br>0.0054x +<br>0.2681 | -49.65      | 9.93                  | y =<br>0.0054x +<br>0.0641 | -11.87      | 2.37                  |
| <b>C13</b> | y =<br>0.0058x +<br>0.1941 | -33.47      | 6.69                  | y =<br>0.0059x +<br>0.0822 | -13.93      | 2.79                  |
| <b>C14</b> | y =<br>0.0029x +<br>0.3714 | -128.07     | 25.61                 | y =<br>0.0056x +<br>0.0621 | -11.09      | 2.22                  |
| <b>C15</b> | y =<br>0.0051x +<br>0.2411 | -47.27      | 9.45                  | y =<br>0.0024x +<br>0.0565 | -23.54      | 4.71                  |
| <b>C16</b> | y =<br>0.0035x +<br>0.2437 | -69.63      | 13.93                 | y =<br>0.0032x +<br>0.1089 | -34.03      | 6.81                  |
| <b>C17</b> | y =<br>0.0039x +<br>0.1755 | -45.00      | 9.00                  | y =<br>0.0032x +<br>0.0262 | -8.19       | 1.64                  |
| <b>C18</b> | y =<br>0.0046x +<br>0.3874 | -84.22      | 16.84                 | y =<br>0.0053x +<br>0.0433 | -8.17       | 1.63                  |

**Supplementary Table S3: Results of the linearity study of NO<sub>2</sub>-OA and NO<sub>2</sub>-LA in plasma**

| NO <sub>2</sub> -OA<br>(nM) | Peak area ratios |       |       | Average                 | Std dev                     | Std error | %RSD   |
|-----------------------------|------------------|-------|-------|-------------------------|-----------------------------|-----------|--------|
|                             | Cal 1            | Cal 2 | Cal 3 |                         |                             |           |        |
| 0                           | 0.151            | 0.169 | 0.132 | 0.151                   | 0.0185                      | 0.0107    | 12.280 |
| 15                          | 0.236            | 0.245 | 0.230 | 0.236                   | 0.237                       | 0.008     | 0.004  |
| 30                          | 0.288            | 0.227 | 0.283 | 0.266                   | 0.034                       | 0.020     | 12.732 |
| 45                          | 0.374            | 0.252 | 0.394 | 0.340                   | 0.077                       | 0.044     | 22.607 |
| 60                          | 0.460            | 0.365 | 0.447 | 0.424                   | 0.052                       | 0.030     | 12.148 |
| <b>Slope</b> 0.0043         |                  |       |       | <b>Intercept</b> 0.1536 | <b>R<sup>2</sup></b> 0.9805 |           |        |

  

| NO <sub>2</sub> -LA<br>(nM) | Peak area ratios |       |       | Average                 | Std dev                     | Std error | %RSD   |
|-----------------------------|------------------|-------|-------|-------------------------|-----------------------------|-----------|--------|
|                             | Cal 1            | Cal 2 | Cal 3 |                         |                             |           |        |
| 0                           | 0.029            | 0.029 | 0.030 | 0.029                   | 0.0005                      | 0.0003    | 1.830  |
| 15                          | 0.087            | 0.069 | 0.067 | 0.074                   | 0.011                       | 0.006     | 14.872 |
| 30                          | 0.116            | 0.130 | 0.119 | 0.122                   | 0.008                       | 0.004     | 6.196  |
| 45                          | 0.204            | 0.213 | 0.174 | 0.197                   | 0.021                       | 0.012     | 10.408 |
| 60                          | 0.305            | 0.345 | 0.257 | 0.302                   | 0.044                       | 0.025     | 14.560 |
| <b>Slope</b> 0.0045         |                  |       |       | <b>Intercept</b> 0.0112 | <b>R<sup>2</sup></b> 0.9644 |           |        |

**Supplementary Table S4: % deviations of peak area ratios of NO<sub>2</sub>-OA and NO<sub>2</sub>-LA from true values for evaluating accuracy**

|                          | NO <sub>2</sub> -OA |                         |              | NO <sub>2</sub> -LA |                         |              |
|--------------------------|---------------------|-------------------------|--------------|---------------------|-------------------------|--------------|
| <b>Spiked conc. (nM)</b> | <b>True value</b>   | <b>Measured value *</b> | <b>% dev</b> | <b>True value</b>   | <b>Measured value *</b> | <b>% dev</b> |
| 10                       | 0.1966              | 0.208±0.006             | -5.968       | 0.0562              | 0.065±0.005             | -15.355      |
| 35                       | 0.3041              | 0.300±0.039             | 1.348        | 0.1687              | 0.149±0.013             | 11.794       |
| 50                       | 0.3686              | 0.364±0.039             | 1.338        | 0.2362              | 0.281±0.010             | -18.862      |

\* Average of 3 replicates ± standard deviation

**Supplementary Table S5: % RSDs of peak area ratios of NO<sub>2</sub>-OA and NO<sub>2</sub>-LA for evaluating intra- and inter-day precision**

|                          | <b>Intra-day</b>      |       |        | <b>Inter-day</b>      |        |        |
|--------------------------|-----------------------|-------|--------|-----------------------|--------|--------|
| <b>NO<sub>2</sub>-OA</b> | Mean peak area ratio* | SD    | % RSD  | Mean peak area ratio* | SD     | % RSD  |
| 10                       | 0.208                 | 0.006 | 2.813  | 0.209                 | 0.0183 | 8.789  |
| 35                       | 0.300                 | 0.039 | 13.077 | 0.330                 | 0.0263 | 7.965  |
| 50                       | 0.364                 | 0.039 | 10.725 | 0.378                 | 0.0302 | 7.975  |
| <b>NO<sub>2</sub>-LA</b> |                       |       |        |                       |        |        |
| 10                       | 0.065                 | 0.005 | 7.582  | 0.068                 | 0.0082 | 12.015 |
| 35                       | 0.149                 | 0.013 | 8.834  | 0.172                 | 0.0220 | 12.809 |
| 50                       | 0.281                 | 0.010 | 3.412  | 0.249                 | 0.0365 | 14.657 |

\* Average of 3 replicates
