# Supplementary figures and images for: Development and Validation of a Bioanalytical Method for the Quantification of Nitrated Fatty Acids in Plasma Using LC-MS/MS: Application to Cardiovascular Patients
Source: MDPI journal article supplement (doi:10.3390/separations10020087), 2023-01-27

50 nM

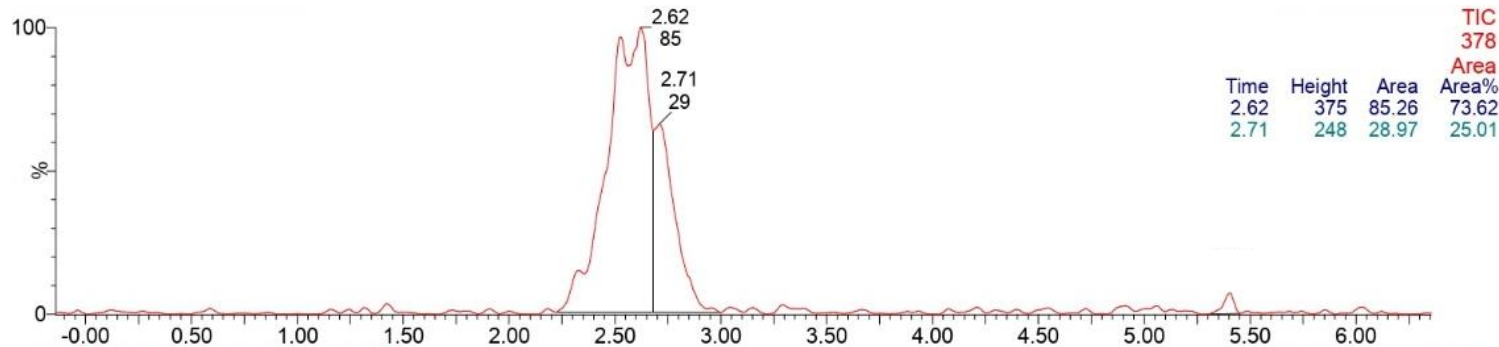

100 nM

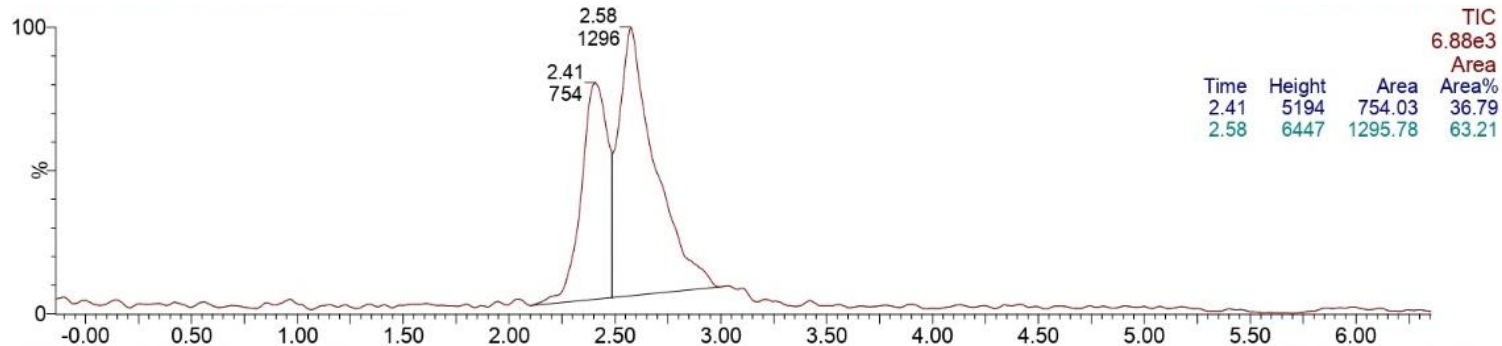

Supplement: s1 [file s1]
